# Supplementary material for: Mitogen-Inducible Gene-6 Mediates Feedback Inhibition from Mutated BRAF towards the Epidermal Growth Factor Receptor and Thereby Limits Malignant Transformation
Source: PubMed Central journal article supplement (PMC4466796; doi:10.1371/journal.pone.0129859), 2015-06-12
Supplement: pone.0129859.s010.pdf [file pone.0129859.s010.pdf]

| <b>Gene Symbol</b>     | <b>Gene name</b>                                                         | <b>Primer Sequence</b>         | <b>Amplicon Size</b> | <b>PCR efficiency [%]</b> |
|------------------------|--------------------------------------------------------------------------|--------------------------------|----------------------|---------------------------|
| <i>ERFFI 1 (MIG-6)</i> | <i>ERBB Receptor Feedback Inhibitor 1<br/>(Mitogen-Inducible Gene 6)</i> | fw: CTGGAGCAGTCGCAGTGAG        | 136bp                | 96.47                     |
|                        |                                                                          | rev: GCCATTCATCGGAGCAGATTTG    |                      |                           |
| <i>GAPDH</i>           | <i>Glyceraldehyde-3-Phosphate<br/>Dehydrogenase</i>                      | fw: CAACAGCGACACCCACTCCT       | 115bp                | 101.34                    |
|                        |                                                                          | rev: CACCCTGTTGCTGTAGCCAAA     |                      |                           |
| <i>RPL37A</i>          | <i>Ribosomal Protein L37A</i>                                            | fw: ATTGAAATCAGCCAGCACGC       | 94bp                 | 107.77%                   |
|                        |                                                                          | rev: AGGAACCACAGTGCCAGATCC     |                      |                           |
| <i>GUSB</i>            | <i>Beta-Glucuronidase</i>                                                | fw: GAAAATATGTGGTTGGAGAGCTCATT | 81bp                 | 101.8                     |
|                        |                                                                          | rev: CCGAGTGAAGATCCCCTTTTTA    |                      |                           |
